1  
2  
3  
4  
5  
6  
7  
8  
9  
10  
11  
12  
13  
14  
15  
16  
17  
18  
19  
20  
21  
22  
23

Early dosage compensation of zygotically-expressed genes in *Drosophila melanogaster*  
is mediated through a post-transcriptional regulatory mechanism

Victoria M. Blake<sup>1,#\*</sup>, Michael B. Eisen<sup>1,2,3,#</sup>

<sup>1</sup>Department of Molecular and Cell Biology, University of California, Berkeley, California,  
United States of America

<sup>2</sup>Department of Integrative Biology, University of California, Berkeley, California, United  
States of America

<sup>3</sup>Howard Hughes Medical Institute, University of California, Berkeley, California, United  
States of America

#Current Address: 151A Koshland Hall, Berkeley, California, 94720, United States of  
America

\*Corresponding author

Email: [victoriablake104@gmail.com](mailto:victoriablake104@gmail.com)

24 **Full title:** Early Dosage Compensation of zygotically-expressed genes in *Drosophila*  
25 *melanogaster* is mediated through a post-transcriptional regulatory mechanism

26

27 **Short title:** Regulation of RNA abundance of X-linked genes during early  
28 embryogenesis in *Drosophila melanogaster*

29

30 **Funding:** This work was funded by a Howard Hughes Medical Institute Investigator  
31 award to MBE, and a National Science Foundation Graduate Research Fellowship to  
32 VMB. The funders had no role in study design, data collection and analysis, decision to  
33 publish, or preparation of the manuscript.

34

35 **Competing Interests:** MBE is a co-founder of PLOS.

36

37 **Abstract:**

38

39 Many key regulators of early embryogenesis in *Drosophila melanogaster* are X-linked.

40 However, the canonical, MSL-mediated dosage compensation, which involves hyper-

41 transcription of the genes on the single X chromosome in males, is not active until the

42 post-synctial stage of development. A separate MSL-independent dosage

43 compensation system active earlier in development has been described, though the

44 mechanism through which the process functions remain unclear. In this study, we

45 quantified transcription in living embryos at single-locus resolution to determine if early

46 dosage compensation of the X-linked genes *buttonhead* and *giant* is sensitive to X

47 chromosome dose. We found no evidence for a transcriptionally regulated mechanism  
48 of early dosage compensation, suggesting that the previously observed compensation  
49 of mRNA levels for these genes is achieved via a post-transcriptional regulatory  
50 mechanism.

51

52

### 53 **Introduction**

54

55 In multicellular diploid organisms with chromosomal sex determination, the functional  
56 degeneration of sex chromosome specific to the heterogametic sex (the Y in XY  
57 systems and W in ZW systems) creates a dosage imbalance for sex-chromosome  
58 encoded genes. To mitigate the detrimental impact that this dosage imbalance could  
59 have on fitness, a variety of mechanisms have evolved to equalize the abundance of  
60 gene products found on only one sex chromosome (typically the X or Z).

61

62 In the vinegar fly *Drosophila melanogaster*, which uses an XX/XY sex-determination  
63 system, dosage compensation is achieved by upregulating transcription of genes on the  
64 male X chromosome (reviewed in Kuroda et al. 2016). Mutations that affect this process  
65 are lethal in males (Belote and Lucchesi 1980, Lucchesi and Skripsky 1981, Hilfiker et  
66 al. 1997, Meller and Ratner 2002).

67

68 All but one of the Male Sex Lethal (MSL) proteins that mediate this process are present  
69 in the maternally deposited protein component. Male specificity is achieved through the

70 activity of the male-specific MSL-2, which directs assembly of the dosage compensation  
71 complex to the X chromosome, resulting in acetylation of H4K16 by MOF (Hilfiker et al.  
72 1997, Smith et al. 2000) and a subsequent doubling of transcription from X-linked genes  
73 (Smith et al. 2001, Gelbart et al. 2009).

74

75 However, an early, MSL-2 independent dosage compensation system acting on *runt*  
76 was discovered via genetic experiments (Gergen 1987, Bernstein and Cline 1994) and  
77 shown to apply more broadly by direct measurement of mRNA levels in early male and  
78 female embryos (Lott et al. 2011). It was hypothesized, based on the enrichment of  
79 putative binding sites for the master sex regulator Sxl in the 5' and 3' untranslated  
80 regions of X encoded genes, that this system was based on post-transcriptional  
81 regulation of mRNA levels (Bernstein & Cline 1994, Lott et al. 2011).

82

83 Here we use quantitative live-embryo imaging (Garcia et al. 2013, Bothma et al. 2014)  
84 to compare rates of transcription at individual X-linked loci across early development in  
85 male and female embryos. Briefly, transcription of a gene tagged with a reporter  
86 sequence (MS2 or PP7) forms stem loops that, when bound by a coat protein (MCP or  
87 PCP) conjugated to GFP, gives rise to a fluorescent signal. This allows for simultaneous  
88 direct quantification via microscopy of transcription rates at individual loci across many  
89 nuclei. The ability to quantify transcription rates of candidate genes in embryos of both  
90 sexes makes this system uniquely amenable for testing if early dosage compensation is  
91 due to increasing the rate of transcription of genes on the male X chromosome.

92

93 We focus on four X-linked genes: *giant* (*gt*) and *buttonhead* (*btd*) that had previously  
94 been shown to be dosage compensated in the early embryo, and *embryonic lethal*  
95 *abnormal vision* (*elav*) and *bangles and beads* (*bnb*) whose early mRNA levels are  
96 dosage sensitive. We found that the early dosage compensation observed for these  
97 genes was not due to a doubling of transcription in males, suggesting that this process  
98 is likely regulated post-transcriptionally. In addition, we discovered an unreported  
99 doubling of the transcription rate in females for *elav*, a gene that is not dosage  
100 compensated and has no defined role in sex differentiation.

101

## 102 **Materials and Methods:**

103

### 104 **DNA constructs:**

105 Fly strains were tagged with MS2 or PP7 reporter sequences at the endogenous loci of  
106 X-linked genes through CRISPR-Cas9 Homology-Directed Recombination. We used the  
107 U6-gRNA protocol from flycrispr.org (Gratz et al. 2016) to clone three guide RNA  
108 sequences per gene, targeting a 100 bp region around the start codon, into pCFD5  
109 plasmids (Port and Bullock 2016). For donor plasmids, we inserted a 24X MS2 or PP7  
110 cassette (Garcia et al. 2013, Liu et al. 2020) between 1kb of homology arms for a gene  
111 of interest into a pUC19 vector backbone using the NEBuilder HiFi DNA Assembly  
112 protocol. We attempted to tag all target genes with both MS2 and PP7, but, due to low  
113 editing efficiency and potentially other factors, recovered only one for each gene, as  
114 described in text.

115

116 **Fly line generation:**

117 gRNA, donor, and selection plasmids (for phenotypic screening, Kane et al. 2017) were  
118 purified and sent to Rainbow Transgenic Inc. for microinjection into *y2 cho2 v1; Sp/CyO*,  
119 *P{nos-Cas9, y+, v+}2A* embryos.

120

121 Full details of construct and sequence information can be found in a public [Benchling](#)  
122 [folder](#).

123

124 Progeny of injected flies with an *ebony* phenotype were molecularly screened by PCR  
125 for the insertion of the MS2 or PP7 cassettes at endogenous X-linked loci. Lines with  
126 successful transgene insertion were confirmed by Sanger sequencing.

127

128 Transcription of X-linked genes was measured by imaging embryos homozygous for the  
129 MS2- or PP7-tagged gene and a constitutively expressed *Histone-RFP; MCP-eGFP*  
130 (Garcia et al. 2013) or *PCP-eGFP* (Larson et al. 2011) allele.

131

132 **Live imaging:**

133

134 **Image acquisition:**

135 Sample preparation followed the procedures described in (Bothma et al. 2014, Garcia et  
136 al. 2013, Lammers et al. 2020). In brief, embryos were collected, dechorinated with 50%  
137 bleach, and mounted between a semipermeable membrane (Lumox film, Starstedt,  
138 Germany) and a coverslip while in Halocarbon 27 oil (Sigma). Data collection was

139 performed using a Zeiss LSM 800 scanning confocal microscope (Zeiss, Jana,  
140 Germany). The MCP-eGFP or PCP-eGFP were excited with laser wavelengths of 488  
141 nm, respectively. Data were collected at a 40X objective with oil immersion where the  
142 average laser power on the specimen was 7.3 mW and a master gain of 550V. The  
143 confocal stack consisted of 21 equidistant slices with an overall z-height of 5.97  $\mu\text{m}$  and  
144 an interslice distance of 0.29  $\mu\text{m}$ . The images were acquired at a frame time of 633.02  
145 ms and a pixel dwell time of 1.03  $\mu\text{s}$ . Image sizes were 78  $\mu\text{m}$  x 19.5  $\mu\text{m}$ , a frame size  
146 of 1024 pixels x 256 pixels, and a pixel size of 0.08  $\mu\text{m}$ . Data were taken for at least 3  
147 embryos of each sex per genotype, and each embryo was imaged for at least the first  
148 30 minutes of nuclear cycle 14.

149

#### 150 **Image analysis:**

151 Live-imaging data were analyzed using a custom-written software following the  
152 protocols in (Garcia et al. 2013, Lammers et al. 2020). This software, containing  
153 MATLAB code, can be found in a [public GitHub repository](#). In brief, this procedure  
154 involves nuclear segmentation, segmenting transcription spots based on fluorescence,  
155 and calculating the intensity of each MCP-eGFP or PCP-eGFP transcription spot inside  
156 a nucleus as a function of time.

157

#### 158 **Data analysis**

159 To infer bursting parameters from experimental fluorescence traces, we used a  
160 compound-state hidden Markov Model described in Lammers et al. 2020 whose code  
161 can be found in a [public GitHub repository](#).

162

163 All data analysis was done in Python using a Jupyter Notebook with custom code to  
164 generate figures. The Jupyter notebook and all data required to run it are available in  
165 Supplementary File 1 this [Github link](#) .

166

### 167 **Quantitative RNA-FISH:**

#### 168 **Probe design and hybridization:**

169 Custom Stellaris® FISH Probes were designed against *gt* and *bnb* RNA by utilizing the  
170 Stellaris® RNA FISH Probe Designer (Biosearch Technologies, Inc., Petaluma, CA)  
171 available online at [www.biosearchtech.com/stellarisdesigner](http://www.biosearchtech.com/stellarisdesigner) (version 4.2). Single-  
172 molecule RNA-FISH protocol was followed using the *D. melanogaster* embryo protocol  
173 at the Biosearch Technologies website.

174

#### 175 **Image acquisition:**

176 Embryos were staged at nuclear cycle 14A based on percent membrane invagination  
177 during cellularization (< 25%). Data collection was performed using a Zeiss LSM 800  
178 scanning confocal microscope (Zeiss, Jana, Germany). A laser wavelength of 670 nm  
179 was used to excite the probe-conjugated fluors. Data were collected at a 63X objective  
180 with oil immersion with the laser power on the specimen was set to 5% and a master  
181 gain of 650V. The images were acquired at a frame time of 930.91 ms and a pixel dwell  
182 time of 1.52  $\mu$ s. Image sizes were 202.8  $\mu$ m x 202.8  $\mu$ m, a frame size of 512 pixels x  
183 512 pixels, and a pixel size of 0.4  $\mu$ m.

184



185 The field of view was adjusted to encompass the entire expression domain of probed  
186 patterned genes, and the bounds of the z-stack for each image were determined by  
187 when the z-plane no longer detected the probe fluorescent signal.

188

189 Full details of probe sequence information can be found in a public [Benchling folder](#).

190 Raw and max intensity projection images can be found in Supplemental File 2.

191

## 192 **Image analysis:**

193 Total signal of mRNA with background correction was measured for probed genes using  
194 ImageJ. Z-slices of the original image that contained no signal were trimmed from the  
195 image before generating a 2D max intensity projection. We followed the Cooper Lab  
196 protocol for Quantitation of Total Fluorescence per Cell with Background correction  
197 (<https://cooperlab.wustl.edu/>). In brief, two ROIs were determined in ImageJ: one to  
198 measure signal and the other to measure background. We then averaged the mean  
199 Integrated Density of the signal (5 separate measurements encompassing the total  
200 expression domain) and of the background. The mean background is subtracted from  
201 the mean integrated density, and then divided by the area of the signal ROI to obtain  
202 the Corrected Integrated Density.

203

## 204 **Results**

205

206 Previous work identified a wide-spread dosage compensation of zygotic transcripts prior  
207 to cellularization, where 36 out of 85 X-linked genes showed less than a 1.5-fold excess

208 of transcript abundance in female embryos relative to their male counterparts (Lott *et*  
209 *al.*, 2011). Many of these early-compensated genes are key developmental regulators,  
210 where differences in transcript abundance could pose profound consequences to  
211 organismal development. Because these early-compensated genes are regulated  
212 before MSL-2, the molecule that mediates canonical dosage compensation, is  
213 expressed, we sought to investigate if the early-compensation of these developmental  
214 regulators occurred through a transcriptional mechanism independent of MSL-2.

215  
216 We chose two early-compensated genes (*gt* and *btd*) for further study that are essential  
217 for mediating embryonic development and whose mRNA abundance is matched in male  
218 and female embryos during the early nuclear cycles. Because not all zygotically-  
219 transcribed genes emanating from X are early-compensated, we chose two additional  
220 genes (*elav* and *bnb*) with twice as much female mRNA abundant relative to males as a  
221 point of comparison in our study. All four of these genes reach maximum transcript  
222 abundance during the first half of nuclear cycle 14 (Lott *et al.*, 2011), mitigating any  
223 differences due to developmental stages across datasets.

224  
225 We used CRISPR-Cas9 (Gratz *et al.*, 2015) to insert an array of either MS2 or PP7  
226 stem loop sequences immediately upstream of the translation start codon of the  
227 endogenous gene of interest. The rationale behind choosing this insertion site was to  
228 position at the stem loops sequences at beginning of the resulting transcript, ensuring a  
229 robust reporter signal of when transcription is occurring. The MS2 or PP7 sequences  
230 were flanked by the donor and acceptor splice sites from the *hunchback* intron so that

231 the stem loops would be removed from the mature mRNA to prevent problems with  
232 RNA localization (Heinrich *et al.*, 2017) or the translation of the endogenous protein.  
233  
234 We homozygosed the lines containing MS2 and PP7-tagged genes and crossed in a  
235 transgene encoding an MCP-GFP (or PCP-GFP) fusion protein that binds transcribed  
236 stem loop sequences. The binding of fluorescently conjugated coat protein to these  
237 stem loops (Bernardi *et al.*, 1972) gives rise to a fluorescent puncta (what we will refer to  
238 as “spots” moving forward) in the nucleus (Figure 1B; Garcia *et al.*, 2013) whose  
239 fluorescence intensity correlates with the abundance of RNA present at the locus  
240 (Garcia *et al.* 2013). This system offers a spatio-temporal and quantitative  
241 characterization of transcript abundance for a gene of interest (Movies 1 & 2).

242  
243 **Figure 1: MS2-MCP and PP7-PCP reporter systems measure transcription rate of**  
244 **X-linked genes in the early *Drosophila melanogaster* embryo** A) An example  
245 schematic of how the PP7-PCP reporter system works: 24 repeats of the PP7 stem loop  
246 sequence (yellow) are flanked by splice donor and acceptor sites from the intron of the  
247 *hunchback* gene (gold) were inserted upstream of the target gene’s start codon (ATG),  
248 represented here by the gene “*buttonhead*”. When transcribed, the PP7 form RNA stem  
249 loops that are subsequently bound by PP7 Coat Protein (orange) conjugated to GFP  
250 (green). B) The anterior portion of an embryo expression *PP7-buttonhead* (*PP7-btd*). C)  
251 Zoomed-in view of the *PP7-btd* expression domain in a female embryo, made evident  
252 by the two transcribing loci in nuclei as opposed to D) the same field of view for *PP7-btd*  
253 expression in a male embryo, where there is only one transcribing locus per nucleus.

254

255 Embryos with successfully incorporated MS2-MCP or PCP-PP7 reporter systems  
256 showed no signs of impaired organismal health and faithfully recapitulated the tagged  
257 gene's expression patterns previously reported by FISH (Figure 1B; Wimmer *et al.*,  
258 1996, Tomancak *et al.* 2002). A key feature of this system that lends itself for studying  
259 dosage compensation is the ease in sexing embryos—the fluorescent spots in nuclei  
260 serve as a readout for the number of X chromosomes present (embryos with two  
261 fluorescent spots within the same nucleus are female, while embryos with one spot are  
262 male) (Figure 1C & 1D).

263

264 We used laser-scanning confocal microscopy to acquire MCP-GFP (or PCP-GFP)  
265 movies of embryos during nc14, the last nuclear cycle before gastrulation. To ensure  
266 consistency across fields of view across these high magnification movies, we optimized  
267 data collection for patterned genes to capture all nuclei along the AP axis within the  
268 same single expression domain (Movies 1 & 2, Supplemental Figure 1). If a gene had a  
269 more ubiquitous expression domain within the anterior domain of the embryo, we  
270 positioned the anterior pole relative to the field of view consistently across all data  
271 collections. To obtain high temporal resolution and optimize signal-to-noise with minimal  
272 bleaching, we collected movies so that the acquisition time for each timepoint (or Z-  
273 stack) corresponded to intervals of 19.5s. In total, we collected 51 movies (Movies 3-51)  
274 with a minimum of three movies of each sex per genotype (see Table 1).

| Embryo ID | Gene     | Sex | nuclear cycle | Duration (in frames) | Total time | Movie #  |
|-----------|----------|-----|---------------|----------------------|------------|----------|
| M_btd_1   | PP7-btd  | M   | 14            | 159                  | 51.675     | Movie 1  |
| F_btd_1   | PP7-btd  | F   | 14            | 172                  | 55.9       | Movie 2  |
| M_btd_2   | PP7-btd  | M   | 14            | 142                  | 46.15      | Movie 3  |
| M_btd_3   | PP7-btd  | M   | 14            | 162                  | 52.65      | Movie 4  |
| M_btd_4   | PP7-btd  | M   | 14            | 125                  | 40.625     | Movie 5  |
| M_btd_5   | PP7-btd  | M   | 14            | 141                  | 45.825     | Movie 6  |
| M_btd_6   | PP7-btd  | M   | 14            | 183                  | 59.475     | Movie 7  |
| M_btd_7   | PP7-btd  | M   | 14            | 99                   | 32.175     | Movie 8  |
| M_btd_8   | PP7-btd  | M   | 14            | 110                  | 35.75      | Movie 9  |
| M_btd_9   | PP7-btd  | M   | 14            | 94                   | 30.55      | Movie 10 |
| F_btd_2   | PP7-btd  | F   | 14            | 122                  | 39.65      | Movie 11 |
| F_btd_3   | PP7-btd  | F   | 14            | 194                  | 63.05      | Movie 12 |
| F_btd_4   | PP7-btd  | F   | 14            | 208                  | 67.6       | Movie 13 |
| F_btd_5   | PP7-btd  | F   | 14            | 123                  | 39.975     | Movie 14 |
| F_btd_6   | PP7-btd  | F   | 14            | 176                  | 57.2       | Movie 15 |
| F_btd_7   | PP7-btd  | F   | 14            | 166                  | 53.95      | Movie 16 |
| F_btd_8   | PP7-btd  | F   | 14            | 173                  | 56.225     | Movie 17 |
| F_btd_9   | PP7-btd  | F   | 14            | 119                  | 38.675     | Movie 18 |
| M_gt_1    | MS2-gt   | M   | 14            | 119                  | 38.675     | Movie 19 |
| M_gt_2    | MS2-gt   | M   | 14            | 148                  | 48.1       | Movie 20 |
| M_gt_3    | MS2-gt   | M   | 14            | 125                  | 40.625     | Movie 21 |
| M_gt_4    | MS2-gt   | M   | 14            | 114                  | 37.05      | Movie 22 |
| F_gt_1    | MS2-gt   | F   | 14            | 111                  | 36.075     | Movie 23 |
| F_gt_2    | MS2-gt   | F   | 14            | 143                  | 46.475     | Movie 24 |
| F_gt_3    | MS2-gt   | F   | 14            | 147                  | 47.775     | Movie 25 |
| F_gt_4    | MS2-gt   | F   | 14            | 139                  | 45.175     | Movie 26 |
| M_bnb_1   | PP7-bnb  | M   | 14            | 102                  | 33.15      | Movie 27 |
| M_bnb_2   | PP7-bnb  | M   | 14            | 122                  | 39.65      | Movie 28 |
| M_bnb_3   | PP7-bnb  | M   | 14            | 122                  | 39.65      | Movie 29 |
| F_bnb_1   | PP7-bnb  | F   | 14            | 160                  | 52         | Movie 30 |
| F_bnb_2   | PP7-bnb  | F   | 14            | 146                  | 47.45      | Movie 31 |
| F_bnb_3   | PP7-bnb  | F   | 14            | 157                  | 51.025     | Movie 32 |
| M_elav_1  | MS2-elav | M   | 14            | 133                  | 43.225     | Movie 33 |
| M_elav_2  | MS2-elav | M   | 14            | 148                  | 48.1       | Movie 34 |
| M_elav_3  | MS2-elav | M   | 14            | 128                  | 41.6       | Movie 35 |
| F_elav_1  | MS2-elav | F   | 14            | 139                  | 45.175     | Movie 36 |
| F_elav_2  | MS2-elav | F   | 14            | 159                  | 51.675     | Movie 37 |
| F_elav_3  | MS2-elav | F   | 14            | 141                  | 45.825     | Movie 38 |
| M13_btd_1 | PP7-btd  | M   | 13            | 33                   | 10.725     | Movie 39 |
| M13_btd_2 | PP7-btd  | M   | 13            | 31                   | 10.075     | Movie 40 |
| M13_btd_3 | PP7-btd  | M   | 13            | 25                   | 8.125      | Movie 41 |
| F13_btd_1 | PP7-btd  | F   | 13            | 26                   | 8.45       | Movie 42 |
| F13_btd_2 | PP7-btd  | F   | 13            | 23                   | 7.475      | Movie 43 |
| F13_btd_3 | PP7-btd  | F   | 13            | 23                   | 7.475      | Movie 44 |
| M13_bnb_1 | PP7-bnb  | M   | 13            | 38                   | 12.35      | Movie 45 |
| M13_bnb_2 | PP7-bnb  | M   | 13            | 25                   | 8.125      | Movie 46 |
| M13_bnb_3 | PP7-bnb  | M   | 13            | 29                   | 9.425      | Movie 47 |
| F13_bnb_1 | PP7-bnb  | F   | 13            | 50                   | 16.25      | Movie 48 |
| F13_bnb_2 | PP7-bnb  | F   | 13            | 44                   | 14.3       | Movie 49 |
| F13_bnb_3 | PP7-bnb  | F   | 13            | 32                   | 10.4       | Movie 50 |

275

276

**Table 1: MS2 or PP7 live-imaging data collected in this study**

277 We used a custom image analysis pipeline (Garcia et al. 2013, Lammers et al. 2020) to  
278 identify nuclei and extract fluorescent intensity measurements for actively transcribing  
279 X-linked loci in embryos of both sexes. A representative example of the resulting data is  
280 shown in Figure 2.

281

## 282 **No hyper-transcription of male X in dosage compensated genes**

283  
284 We compared the average fluorescence intensity (which we expect to be proportional to  
285 polymerase density on transcribing loci) of detected transcription foci from male and  
286 female X chromosomes across time during mitotic cycle 14 for both *btd* and *gt* (Figure  
287 2A). For *btd* they are nearly identical, and for *gt*, the differences both balances out over  
288 time (with slightly higher transcription from male X's early in cycle 14 and slightly higher  
289 transcription from female X's later in cycle 14). As it is possible to increase  
290 transcriptional output even with identical polymerase density on transcribing loci by  
291 increasing the fraction of loci actively transcribing, we also looked at the number of  
292 transcribing loci as a function of time in male and female embryos (Figure 2B), and, as  
293 expected, observed them to be in approximately a 2:1 ratio between females and  
294 males. These results are inconsistent with early dosage compensation of *btd* and *gt*  
295 being achieved via hyper-transcription of the male X.

296

## 297 **Figure 2: Transcription rate of the early dosage compensated *PP7-btd* and *MS2-gt*** 298 **genes is the same in male and female embryos**

299 A) Average distributions of fluorescent spot intensity over time (in frames, where “1” is  
300 the first instance of transcription of the locus during nuclear cycle 14) for all female

301 (orange) and male (dark cyan) *PP7-btd* (N=9 embryos of each sex) and *MS2-gt* (N=4 of  
302 each sex) embryos. The dashed, dark orange line represents double the average  
303 female fluorescent spot intensity for every given timepoint. B) The distribution of  
304 fluorescent spot intensities plotted over time for the dosage compensated *MS2-gt* (N=4  
305 embryos of each sex) with total spot intensity histograms on the right. B) The number of  
306 transcribing *PP7-btd* and *MS2-gt* loci throughout nuclear cycle 14. The dashed orange  
307 line represents half of the transcribing female loci.

308

309 We made similar comparisons between average fluorescence and number of  
310 transcribing loci in the two non-compensated loci *bnb* and *elav*. These show more  
311 variation between sexes than two dosage compensated genes, with *bnb* generally  
312 higher in males, and *elav* higher in females (Figure 3).

313

314 **Figure 3: Transcription rate of *PP7-bnb* and *MS2-elav* is does not result in dosage**  
315 **compensation**

316 A) Averages for male (dark cyan) and female (orange) *PP7-bnb* and *MS2-elav*  
317 fluorescent spot intensities plotted over nuclear cycle 14. The dashed, dark orange line  
318 represents double the average female fluorescent spot intensity for every given  
319 timepoint. B) The number of transcribing *PP7-bnb* and *MS2-elav* loci throughout nuclear  
320 cycle 14. The dashed orange line represents half of the transcribing female loci.

321

322 **Discussion**

323 Our tailoring of quantitative live-imaging methods to examine early embryonic dosage  
324 compensation in *Drosophila melanogaster* were motivated by the hypothesis that the  
325 equalizing of mRNA abundance between sexes in the absence of MSL-2 mediated by  
326 regulation of transcription rate at X-linked loci.

327

328 Instead, what our studies revealed was a post-transcriptional mechanism for regulating  
329 early dosage compensation of two key developmental regulators, *btd* and *gt*. These  
330 findings represent a broadening of our understanding of different ways in which the sex  
331 chromosome dosage imbalance is mitigated during early embryogenesis. Our findings  
332 offer a more dynamic way of understanding how mRNA abundance is regulated across  
333 developmental stages. Importantly, this presents a shift in our understanding of how  
334 mRNA abundance is regulated considering the decades of research whose findings  
335 posited that dosage compensation is almost exclusively a transcriptionally regulated  
336 process.

337

338 Sex lethal (Sxl), and RNA-binding protein that inhibits dosage compensation in females,  
339 may play a role in regulating the abundance of X-linked mRNAs during early  
340 embryogenesis. The regulation of X-linked *runt* abundance by Sxl is the only  
341 documented observation of an MSL-2-independent, post-transcriptional regulation of  
342 dosage compensation prior to our study (Gergen 1987, Bernstein and Cline 1994). It is  
343 possible that because the two molecules regulate each other's expression (Kramer et  
344 al. 1999, Torres et al. 2009), that observation of post-transcriptional dosage



345 compensation by Sxl is gene-specific and therefore inapplicable to the widespread  
346 phenomenon we observe during early embryogenesis (Lott et al. 2011).

347

348 Considering our findings, the observed enrichment of predicted Sxl binding sites (poly-U  
349 tracts) in the 5' and 3' UTRs of many X-linked genes (Kelley et al. 1995) may point to  
350 one mechanism for post-transcriptionally regulating dosage compensation. There is no  
351 direct correlation between genes that are early dosage compensated and their predicted  
352 regulation by Sxl—not all genes that are early dosage compensated are predicted to be  
353 Sxl targets, and not all predicted Sxl targets are early dosage compensation. There may  
354 however be a subset of early dosage-compensated genes whose abundance may be  
355 regulated by Sxl, a hypothesis worth exploring in future studies.

356

357 It is formally possible that regulation of transcriptional elongation may mediate early  
358 dosage compensation of *btd* and *gt*. Because the MS2 and PP7 stem loop sequences in  
359 our study are inserted immediately upstream of the translation start codon and flanked  
360 by splice donor and acceptor sites from the *hb* intron, our findings speak only to the  
361 regulation of transcription initiation. However, a recent study using MS2 and PP7  
362 reporter systems demonstrated a concerted regulation of transcription initiation as  
363 opposed to a highly variable regulation of elongation between nuclei (Liu et al. 2020).  
364 These findings suggest that elongation is not the major contributor to transcriptional  
365 regulation, though the role of elongation during early dosage compensation using these  
366 tools warrants further study.

367

368 While the primary goal of this study was to study dosage compensation, our  
369 measurements of transcription rate at endogenous loci represent a significant advance  
370 for *in vivo* studies of mechanisms of gene regulation in the *D. melanogaster* embryo.  
371 Our use of our reporter at an X-linked loci for sexing embryos also provides a  
372 straightforward control for detecting differences in the regulation of gene expression  
373 between male and female embryos.

374

375 We hope that our data, as well as the reagents generated for the purposes of our study,  
376 can help address other open questions about gene regulation in the early *D.*  
377 *melanogaster* embryo. The reagents generated can be used for protein colocalization  
378 studies or can be crossed mutant alleles of interest to assess the contribution of a  
379 particular molecule in the regulation of our tagged genes. Overall, we are eager to learn  
380 how the data and reagents generated in our discovery of a post-transcriptional form of  
381 early dosage compensation make possible future learnings that deepen the  
382 community's understanding of regulating gene expression during development.

383

#### 384 **Supporting Information**

385

#### 386 **Supplementary Figure 1: Transcription rate of *PP7-btd* and *MS2-gt* is the same in** 387 **male and female embryos**

388 A) Distributions of fluorescent spot intensity over time (in frames, where “1” is the the  
389 first instance of transcription of the locus during nuclear cycle 14) for all female (orange)  
390 and male (dark cyan) embryos (N=9 embryos of each sex) with total spot intensity

391 histograms on the right. B) The distribution of fluorescent spot intensities plotted over  
392 time for the dosage compensated *MS2-gt* (N=4 embryos of each sex) with total spot  
393 intensity histograms on the right. B&C) The distribution of fluorescent spot intensities  
394 plotted over time for *PP7-bnb* and *MS2-elav*, genes that are not early dosage  
395 compensated (N=3 embryos of each sex for each genotype) with total spot intensity  
396 histograms on the right.

397

398 **Supplementary Figure 2: Validation of early dosage compensation phenotype by**

399 **quantitative FISH** A) A maximum intensity projection of the anterior portion of a wild

400 type male embryo at early nc14 probed for *gt* (an early dosage compensated gene)

401 RNA and B) a female embryo probed for *bnb* (an X-linked gene that is not early dosage

402 compensated) RNA. Embryos were sexed by determining the number of large puncta

403 were present within nuclei, which are dark and circular in appearance. C & D)

404 Quantification of total probe signal for each probe in individual embryos, where the

405 signal intensity was averaged across the expression domain with background

406 subtraction.

407

408 **Supplemental Figure 3: Transcription rate for *PP7-btd* and *PP7-bnb* are the same**

409 **in male and female embryos at nuclear cycle 13** A) The total distribution of

410 fluorescent spot intensities and the same data plotted over the course of nuclear cycle

411 13 for *PP7-btd* (N=3 embryos for each sex). B) The total distribution of fluorescent spot

412 intensities and the same data plotted over the course of nuclear cycle 13 for *PP7-bnb*

413 (N=3 embryos for each sex).

414

415 **Supplemental Figure 4: Total distribution of spot intensities of *MS2-gt*, *MS2-elav*,**

416 **and *PP7-bnb* A)** Total distributions of fluorescent spot intensity for all female (orange)

417 and male (dark cyan) *MS2-gt* embryos (N=4 embryos for each sex) and the same data

418 plotted for individual embryos by sex. We also plotted data for *MS2-elav* in B) and *PP7-*

419 *bnb* in C) in the same manner (N=3 embryos for each sex per genotype).

420

421 **Supplementary Figure 5: Transcription rate of *PP7-btd* varies along the Dorsal-**

422 **Ventral axis of the developing embryo A)** Distribution of fluorescent intensity of *PP7-*

423 *btd* spots in individual male and female embryos. B) Variation in the width of the *PP7-*

424 *btd* expression domain along the DV axis, where the dorsal (39% of the field of view)

425 expression domain correlates with spots of weaker fluorescence intensity (indicated by

426 the green color that matches one of the individual histograms of a male embryo in A).

427 An embryo whose recorded *PP7-btd* expression is more ventral (52% field of view) has

428 a wider distribution of spot fluorescent intensities. C) Distribution of fluorescent spot

429 intensities of individual embryos matched by FOV, and therefore, DV position. D)

430 Average particle intensities plotted over time for two male and female embryos on

431 different positions on the DV axis.

432

433 **Acknowledgments:**

434 We thank Hernan Garcia for pioneering techniques for quantitative imaging of live

435 embryos and for project insight; Nicholas Lammers for help with computational analysis;

436 Gabriella Martini for generating the *MS2-gt* fly line; Barbara Meyer, Nicholas Ingolia,

437 and Doris Bachtrog for helpful comments; Michael Stadler and members of the Eisen  
438 lab for helpful comments and project insight.

439

440 **References:**

441 Beadle LR, Love LC, Shapovalova Y, Artemev A, Rattray M, Ashe HL. Modelling global  
442 mRNA dynamics during *Drosophila* embryogenesis reveals a relationship between  
443 mRNA degradation and P-bodies. bioRxiv:484585 [Preprint]. 2022 [cited 2022 April 20]  
444 Available from: <https://doi.org/10.1101/2022.03.17.484585>.

445

446 Belote JM, Lucchesi JC. MALE-SPECIFIC LETHAL MUTATIONS OF DROSOPHILA  
447 MELANOGASTER. Genetics [Internet]. 1980;96(1):165–86. Available from:  
448 <http://dx.doi.org/10.1093/genetics/96.1.165>

449

450 Bernardi A, Spahr PF. Nucleotide sequence at the binding site for coat protein on RNA  
451 of bacteriophage R17. Proc Natl Acad Sci U S A [Internet]. 1972;69(10):3033–7.  
452 Available from: <http://dx.doi.org/10.1073/pnas.69.10.3033>).

453

454 Bernstein M, Cline TW. Differential effects of Sex-lethal mutations on dosage  
455 compensation early in *Drosophila* development. Genetics [Internet]. 1994;136(3):1051–  
456 61. Available from: <http://dx.doi.org/10.1093/genetics/136.3.1051>

457

458 Bothma JP, Garcia HG, Esposito E, Schlissel G, Gregor T, Levine M. Dynamic  
459 regulation of *eve* stripe 2 expression reveals transcriptional bursts in living *Drosophila*

460 embryos. Proc Natl Acad Sci U S A [Internet]. 2014;111(29):10598–603. Available from:

461 <http://dx.doi.org/10.1073/pnas.1410022111>

462

463 Garcia HG, Tikhonov M, Lin A, Gregor T. Quantitative imaging of transcription in living

464 Drosophila embryos links polymerase activity to patterning. Curr Biol [Internet].

465 2013;23(21):2140–5. Available from: <http://dx.doi.org/10.1016/j.cub.2013.08.054>

466

467 Gelbart ME, Larschan E, Peng S, Park PJ, Kuroda MI. Drosophila MSL complex

468 globally acetylates H4K16 on the male X chromosome for dosage compensation. Nat

469 Struct Mol Biol [Internet]. 2009;16(8):825–32. Available from:

470 <http://dx.doi.org/10.1038/nsmb.1644>

471

472 Gergen JP. Dosage compensation in Drosophila: Evidence that daughterless and sex-lethal

473 control X chromosome activity at the blastoderm stage of embryogenesis. Genetics [Internet].

474 1987;117(3):477–85. Available from: <http://dx.doi.org/10.1093/genetics/117.3.477>

475

476 Gratz SJ, Rubinstein CD, Harrison MM, Wildonger J, O'Connor-Giles KM. CRISPR-

477 Cas9 genome editing in Drosophila. Curr Protoc Mol Biol [Internet]. 2015;111(1):31.2.1-

478 31.2.20. Available from: <http://dx.doi.org/10.1002/0471142727.mb3102s111>

479

480 Heinrich S, Sidler CL, Azzalin CM, Weis K. Stem-loop RNA labeling can affect nuclear

481 and cytoplasmic mRNA processing. RNA [Internet]. 2017;23(2):134–41. Available from:

482 <http://dx.doi.org/10.1261/rna.057786.116>

483

484 Hilfiker A, Hilfiker-Kleiner D, Pannuti A, Lucchesi JC. mof, a putative acetyl transferase  
485 gene related to the Tip60 and MOZ human genes and to the SAS genes of yeast, is  
486 required for dosage compensation in Drosophila. EMBO J [Internet]. 1997;16(8):2054–  
487 60. Available from: <http://dx.doi.org/10.1093/emboj/16.8.2054>

488

489 Kane NS, Vora M, Varre KJ, Padgett RW. Efficient screening of CRISPR/Cas9-induced events  
490 in Drosophila using a co-CRISPR strategy. G3 (Bethesda) [Internet]. 2017;7(1):87–93. Available  
491 from: <http://dx.doi.org/10.1534/g3.116.036723>

492

493 Kelley RL, Solovyeva I, Lyman LM, Richman R, Solovyev V, Kuroda MI. Expression of  
494 msl-2 causes assembly of dosage compensation regulators on the X chromosomes and  
495 female lethality in Drosophila. Cell [Internet]. 1995;81(6):867–77. Available from:  
496 [http://dx.doi.org/10.1016/0092-8674\(95\)90007-1](http://dx.doi.org/10.1016/0092-8674(95)90007-1)

497

498 Kramer SG, Jinks TM, Schedl P, Gergen JP. Direct activation of Sex-lethal transcription by the  
499 Drosophila runt protein. Development [Internet]. 1999;126(1):191–200. Available from:  
500 <http://dx.doi.org/10.1242/dev.126.1.191>

501

502 Kuroda MI, Hilfiker A, Lucchesi JC. Dosage compensation in Drosophila—a model for the  
503 coordinate regulation of transcription. Genetics [Internet]. 2016;204(2):435–50.  
504 Available from: <http://dx.doi.org/10.1534/genetics.115.185108>

505

506 Lammers NC, Galstyan V, Reimer A, Medin SA, Wiggins CH, Garcia HG. Multimodal  
507 transcriptional control of pattern formation in embryonic development. Proc Natl Acad  
508 Sci U S A [Internet]. 2020;117(2):836–47. Available from:  
509 <http://dx.doi.org/10.1073/pnas.1912500117>  
510

511 Larson DR, Zenklusen D, Wu B, Chao JA, Singer RH. Real-time observation of transcription  
512 initiation and elongation on an endogenous yeast gene. Science [Internet]. 2011;332(6028):475–  
513 8. Available from: <http://dx.doi.org/10.1126/science.1202142>  
514

515 Liu J, Hansen, Eck E, Kim YJ, Turner M, Alamos S, Garcia HG. Real-time single-cell  
516 characterization of the eukaryotic transcription cycle reveals correlations between RNA  
517 initiation, elongation, and cleavage. bioRxiv:273474 [Preprint]. 2020 [cited 2022 April  
518 20]. Available from: <https://doi.org/10.1101/2020/08.29.273474>.  
519

520 Lott SE, Villalta JE, Schroth GP, Luo S, Tonkin LA, Eisen MB. Noncanonical  
521 compensation of zygotic X transcription in early *Drosophila melanogaster* development  
522 revealed through single-embryo RNA-seq. PLoS Biol [Internet]. 2011;9(2):e1000590.  
523 Available from: <http://dx.doi.org/10.1371/journal.pbio.1000590>  
524

525 Lucchesi JC, Skripsky T. The link between dosage compensation and sex differentiation  
526 in *Drosophila melanogaster*. Chromosoma [Internet]. 1981;82(2):217–27. Available  
527 from: <http://dx.doi.org/10.1007/bf00286106>  
528



529 Meller VH, Rattner BP. The roX genes encode redundant male-specific lethal transcripts  
530 required for targeting of the MSL complex. EMBO J [Internet]. 2002;21(5):1084–91.

531 Available from: <http://dx.doi.org/10.1093/emboj/21.5.1084>

532

533 Port F, Bullock SL. Augmenting CRISPR applications in Drosophila with tRNA-flanked  
534 sgRNAs. Nat Methods [Internet]. 2016;13(10):852–4. Available from:

535 <http://dx.doi.org/10.1038/nmeth.3972>

536

537 Pritchard DK, Schubiger G. Activation of transcription in Drosophila embryos is a  
538 gradual process mediated by the nucleocytoplasmic ratio. Genes Dev [Internet].

539 1996;10(9):1131–42. Available from: <http://dx.doi.org/10.1101/gad.10.9.1131>

540

541 Smith ER, Allis CD, Lucchesi JC. Linking global histone acetylation to the transcription  
542 enhancement of X-chromosomal genes in Drosophila males. J Biol Chem [Internet].

543 2001;276(34):31483–6. Available from: <http://dx.doi.org/10.1074/jbc.c100351200>

544

545 Smith ER, Pannuti A, Gu W, Steurnagel A, Cook RG, Allis CD, et al. The Drosophila  
546 MSL complex acetylates histone H4 at lysine 16, a chromatin modification linked to  
547 dosage compensation. Mol Cell Biol [Internet]. 2000;20(1):312–8. Available from:

548 <http://dx.doi.org/10.1128/mcb.20.1.312-318.2000>

549

550 Tomancak P, Beaton A, Weiszmam R, Kwan E, Shu S, Lewis SE, et al. Systematic  
551 determination of patterns of gene expression during Drosophila embryogenesis.

552 Genome Biol [Internet]. 2002;3(12):RESEARCH0088. Available from:

553 <http://dx.doi.org/10.1186/gb-2002-3-12-research0088>

554

555 Torres M, Sánchez L. The segmentation gene runt is needed to activate Sex-lethal, a gene that  
556 controls sex determination and dosage compensation in Drosophila. Genet Res. 1992;59(3):189–  
557 98.

558

559 Wimmer EA, Frommer G, Purnell BA, Jäckle H. buttonhead and D-Sp1: a novel  
560 Drosophila gene pair. Mech Dev [Internet]. 1996;59(1):53–62. Available from:

561 [http://dx.doi.org/10.1016/0925-4773\(96\)00575-8](http://dx.doi.org/10.1016/0925-4773(96)00575-8)

562

563

564 Zoller B, Little SC, Gregor T. Diverse spatial expression patterns emerge from unified  
565 kinetics of transcriptional bursting. Cell [Internet]. 2018;175(3):835-847.e25. Available  
566 from: <http://dx.doi.org/10.1016/j.cell.2018.09.056>

567

568

569

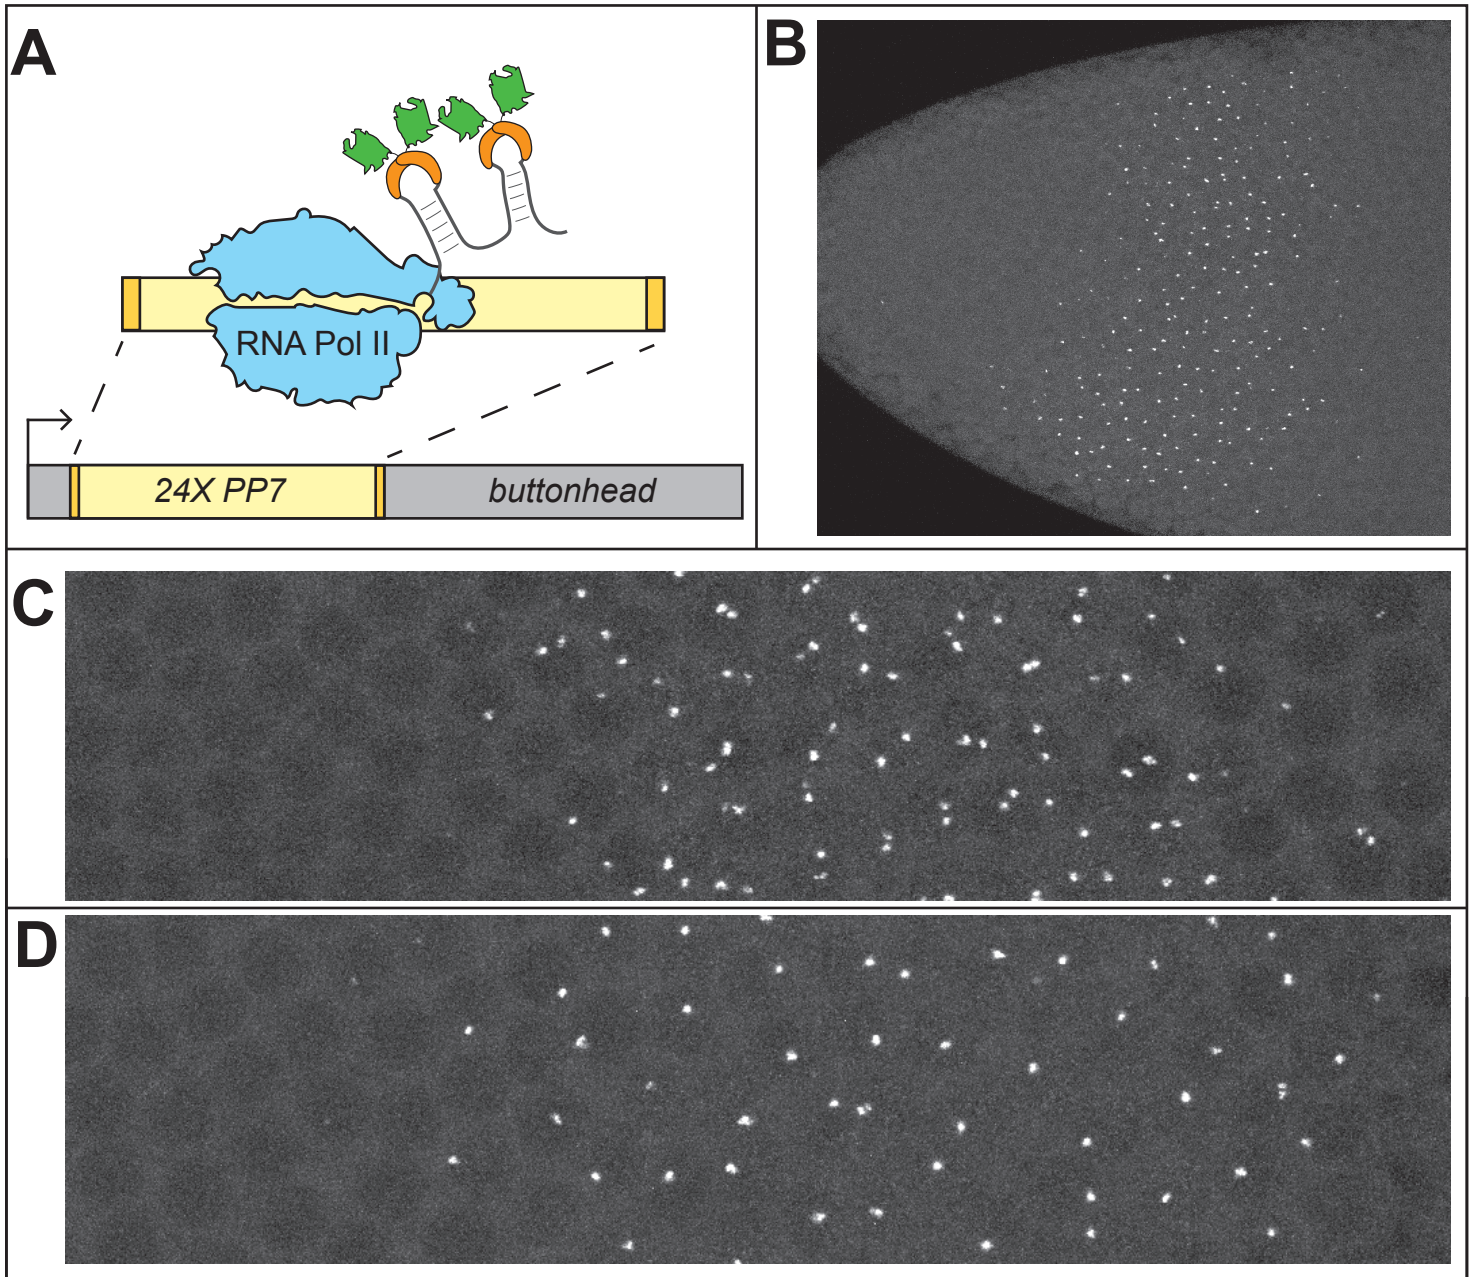

**A**

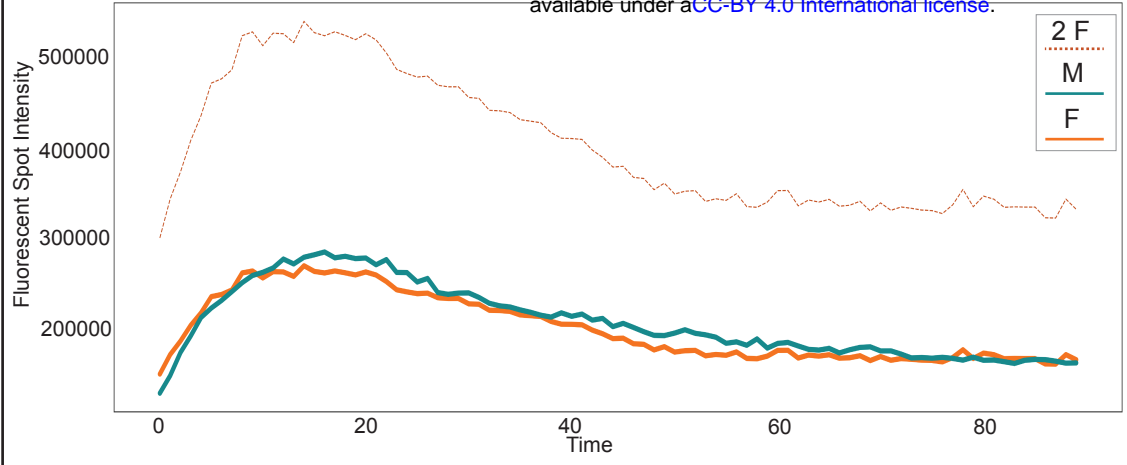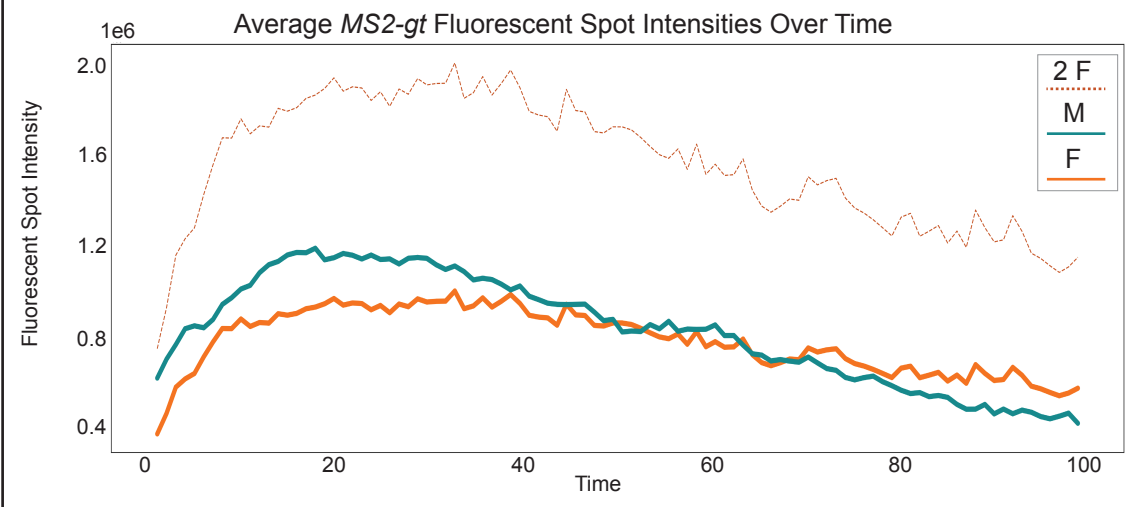

**B**

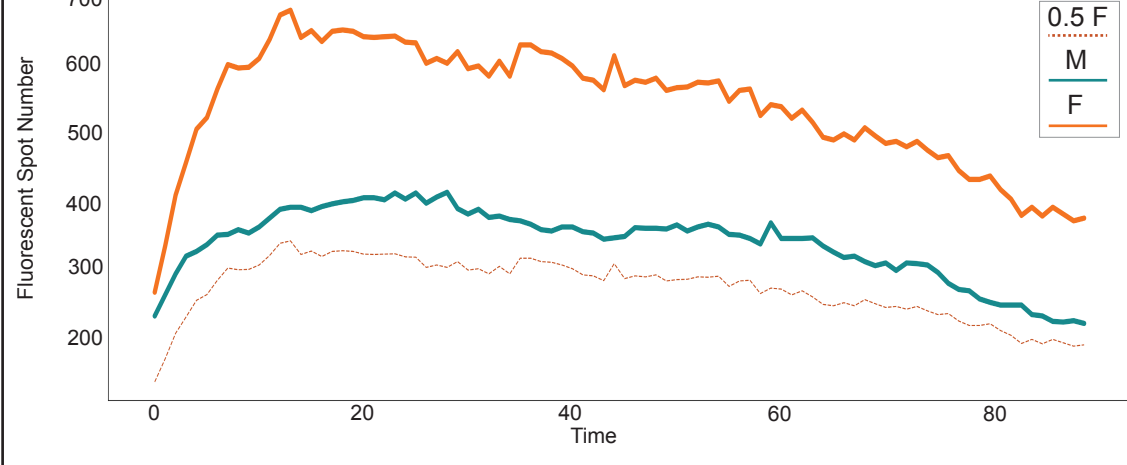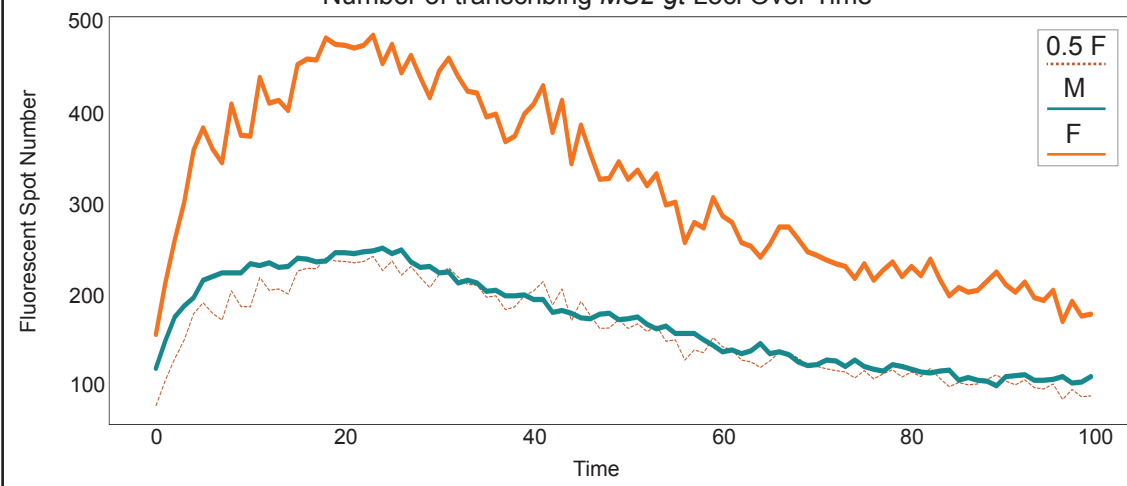

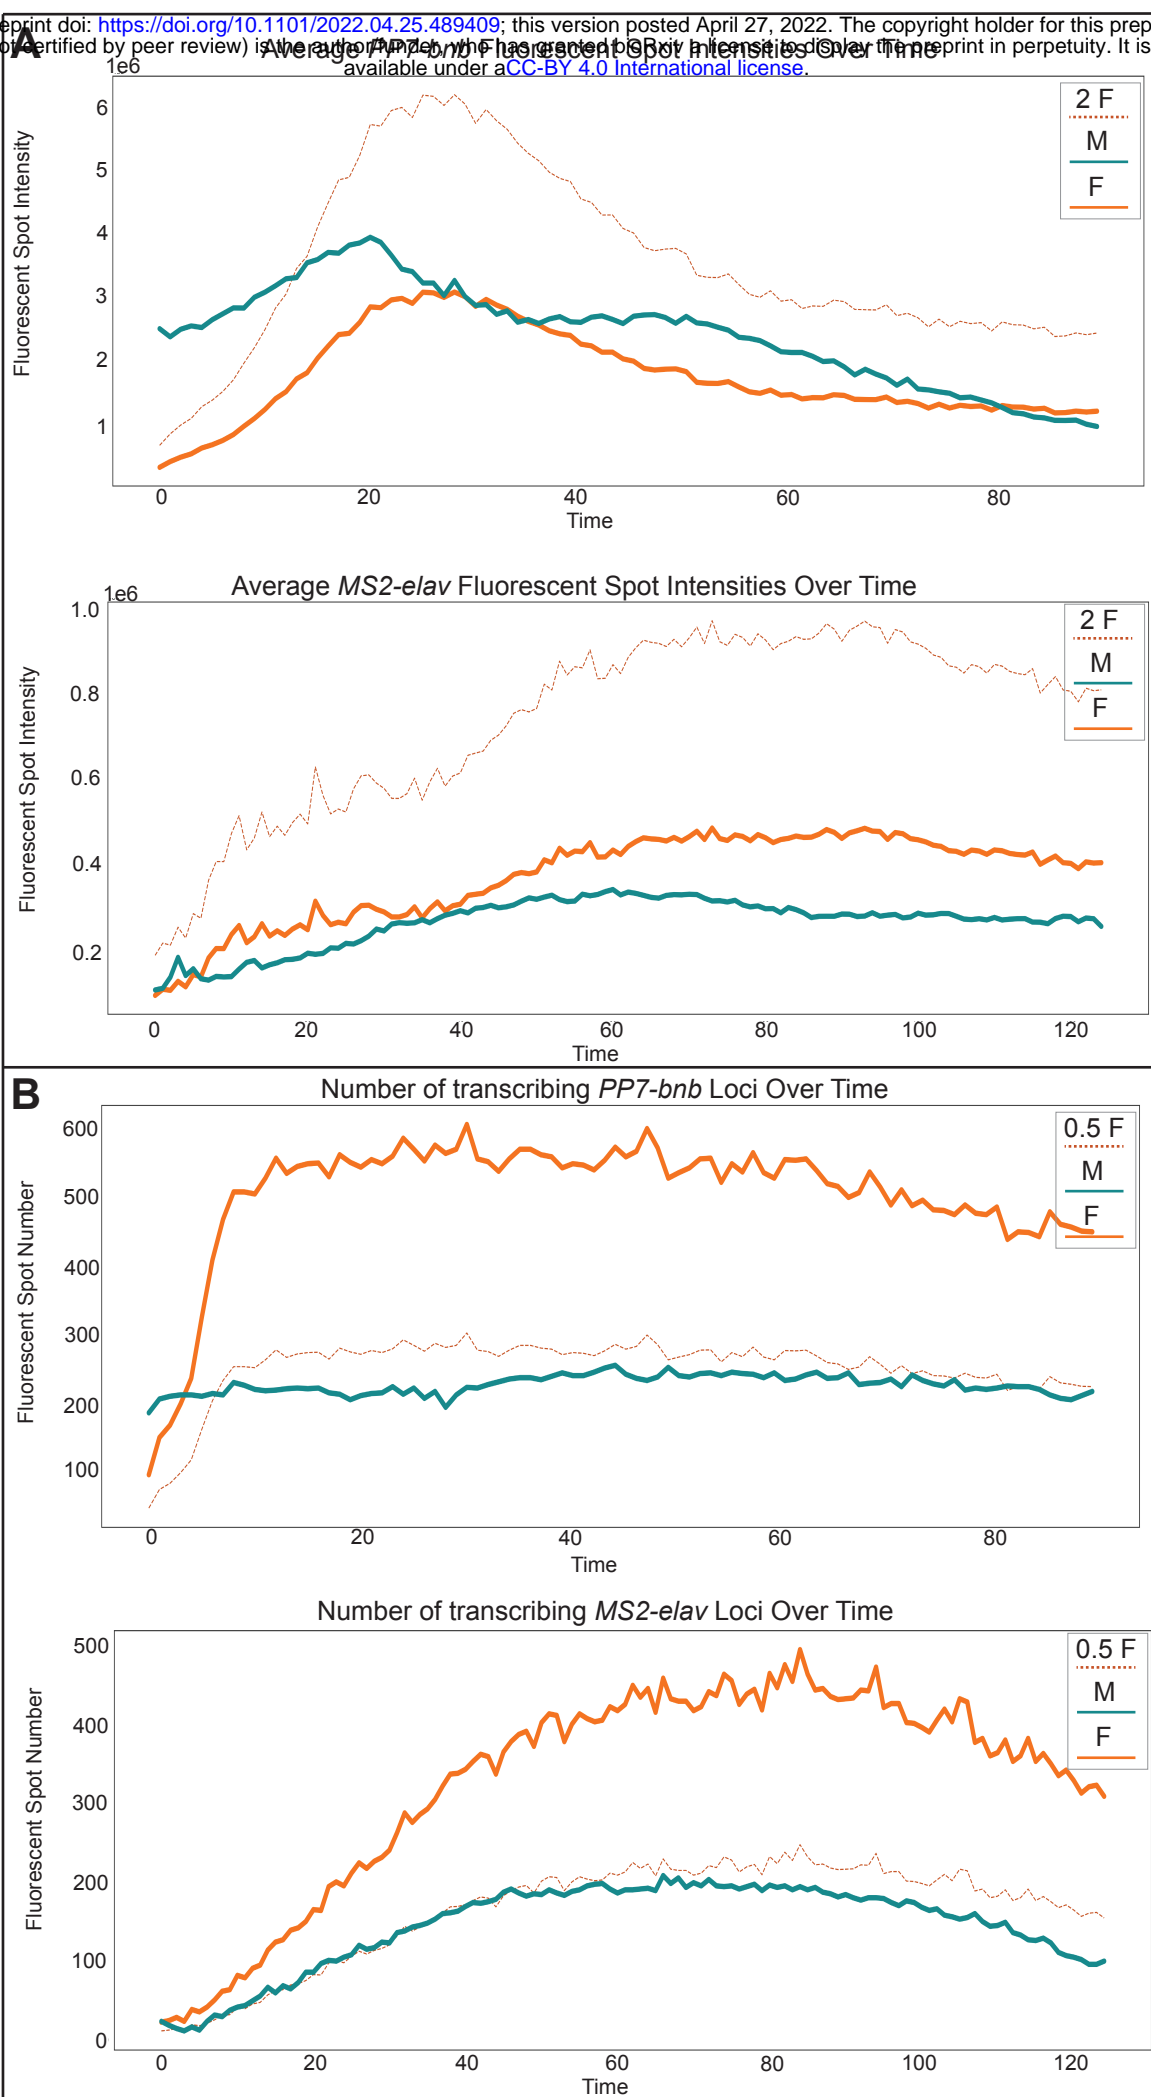













































































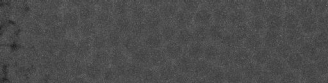

Source: https://www.biorxiv.org/content/10.1101/2022.04.25.489409v2.full.pdf
